# Supplementary material for: Performances of noninvasive prenatal detection for fetal chromosome aneuploidy based on Semiconductor Sequencing Platform (SSP) of difference sequencing depths
Source: Research Square preprint supplement (doi:10.21203/rs.3.rs-1641098/v1), 2022-05-16
Supplement: Supplementary file 1 [file 1b71cccb6d65fbed286dcfb7.xlsx]

## Sheet: Table 1
Table1.Demographic characteristics of the 61581 pregnancies examined by NIPT
characteristic	NIPT	NIPT-plus
Total	49393 (100.00%)	12188 (100.00%)
Mean age when performed NIPT (SD), years	31.2±12.8	31.0±10.3
Singleton pregnancy	48043 (97.27%)	7304 (94.43%)
Twin pregnancy	1375 (2.73%)	406 (5.57%)
Gestational age at NIPT
12~19+6 weeks	28090(56.87%)	9335(76.59%)
20~23+6 weeks	12180(24.66%)	1265(10.38%)
24~29+6 weeks	6061(12.27%)	1241(10.18%)
30~34+6 weeks	2791(5.65%)	339(2.78%)
≥35 weeks	271(0.55%)	8(0.07%)
Serological screening for high or intermediate risks	23978(48.55%)	6171(50.63%)
Serological screening for the single marker value abnormality（AFP, β-HCG,uE3)	14205(28.76%)	1242(10.19%)
Ultrasound soft marker abnormalities	5082(10.29%)	2853(23.41%)
isolated advanced maternal age (≥35 years, AMA)	5858(11.86%)	1413(11.59%)
Other typesa	270(0.55%)	509(4.18%)
IVF pregnancies	3012 (6.10%)	1178 (9.67%)
Fetal fragment fraction	0.15	0.175
a:Previous adverse outcome of pregnancy; previous pregnancy history of chromosomal abnormalities fetus

## Sheet: Table 2
Table 2.Fetal chromosomal aneuploidy results fo NIPT and NIPT-plus
Characteristic	NIPT			NIPT-plus			p
	Positive	Negative	PPV	Positive	Negative	PPV
Trisomy 21	173	38	0.819905	40	6	0.869565	0.42
Trisomy 18	36	16	0.692308	12	3	0.8	＜0.001
Trisomy 13	10	30	0.25	7	13	0.35	0.417
Other autosomal aneuploidies	7	147	0.0454545	5	52	0.0877193	0.239
Sex chromosome aneuploidy	85	85	0.5	23	23	0.5	1
*: significant different between 0.15X and 0.4X seuqencing depth

## Sheet: Table 3
Table 3. Comparison of PPV for Fetal chromosomal aneuploidies between NIPT and NIPT-plus according to different pregnancy characteristic
Characteristic	Prenatal diagnostic validated by CMA/CS in 3 Mb reads		PPV for aneuploidy in 3 Mb reads	Prenatal diagnostic validated by CMA/CS in 8 Mb reads		PPV for aneuploidy in 8 Mb reads	p
	Positive	Negative		Positive	Negative
Serological screening for high or intermediate risks	205	171	0.545213	37	39	0.486842	0.16122
Serological screening for the single marker value abnormality (AFP, β-HCG,uE3)	18	46	0.28125	6	8	0.428571	0.279322
Ultrasound soft marker abnormalities	22	37	0.38	24	14	0.631579	0.012747
isolated advanced maternal age (≥35 years, AMA)	64	57	0.529412	17	25	0.404762	0.165559
Othera	2	5	0.333333	3	11	0.2	0.71714
a:Previous adverse outcome of pregnancy; previous pregnancy history of chromosomal abnormalities fetus.
*: Significant different between 0.15X and 0.4X seuqencing depth

## Sheet: Table 4
Table 4.Fetal autosomal aneuploidy true positive cases for NIPT
Characteristic	Number	NIPT Results	Age/y	Prenatal diagnosis	CMA Result	CS Result	UPD	Complications during pregnancy	Pregnancy outcome
NIPT	case 1	T16	36	CVS	arr[hg19] 16p13.3p12.3(94,807-20,551,431)×2 hmz , 16q23.3q24.3(84,010,949- 90,146,366)×2 hmz	(-)	UPD	/	Fetal death in the uterus
	case 2	T16	35	CVS	arr(16)×2-3	mos47,XN,+16(4)/46,XN(17)	/	FGR	TPO
	case 3	T14	31	CVS	arr[hg19] 14q11.2q13.3(20,520,197-37,350,812)×2 hmz 14q24.2q32.33(70,758,466-104,240,618)×2 hm	(-)	UPD	FGR	Live birth
	case 4	T22	24	CVS	arr(22)×2-3(25%)	mos47,XN,+22(4)/46,XN(17)	/	/	Live birth
	case 5	T20	32	CVS	arr(20)×3	47,XN,+20	/	/	Miscarriage
	case 6	T16	31	CVS	arr(16)×2-3(ratio:34%)		/		TPO
	case 7	T16	29	CVS	arr(16)×2-3(ratio:10%)	mos47,XN,+16(4)/46,XN(39)	/	Fetal cerebral ventriculomegaly L9.1mm/R 9.0mm in 22 week	TPO
NIPT-plus	case 8	T7	38	CVS	arr(7)×2-3(10%)	mos 47,XN,+7(2)/46,XN(16)	/	/	TPO
	case 9	T7	31	CVS	arr(7)×2-3(10%)	mos 47,XN,+7(2)/46,XN(18)	/	/	TPO
	case 10	T7/T11/T20	33	CVS	arr(7)×2-3(10%)	46,XN	/	/	Live birth
	case 11	T20	40	CVS	(-)	mos 47,XN,+20(2)/46,XN(22)	/	/	Continue pregnancy
	case 12	T8	31	CVS	(-)	mos 47,XN,+8[2]/46,XN[32]	/	/	Live biirth
